# Supplementary material for: Transgender female sex workers’ HIV knowledge, experienced stigma, and condom use in the Dominican Republic
Source: PubMed Central journal article supplement (PMC5667872; doi:10.1371/journal.pone.0186457), 2017-11-02
Supplement: pone.0186457.s001.pdf [file pone.0186457.s001.pdf]

| B | C | P1 | P2 | P3 | P4 | P5 | P6  | P7 | P8 | P9 | P10 | P11 | P12 | P13 | P14 | P15 | P16 | P17 | P18 | P19 | P20 | P21 | P22 |
|---|---|----|----|----|----|----|-----|----|----|----|-----|-----|-----|-----|-----|-----|-----|-----|-----|-----|-----|-----|-----|
| 1 | 1 | 12 | 1  | 1  | 0  | 1  | 4   | 1  | 0  | 10 | 14  | 0   | 9   | 5   | 0   | M   | M   | M   | M   | M   | M   | 1   | 1   |
| 1 | 1 | 12 | 1  | 1  | 0  | 0  | 3   | 2  | 0  | 13 | 4   | 0   | 2   | 2   | 0   | M   | M   | M   | M   | M   | M   | 1   | 1   |
| 1 | 1 | 13 | 1  | 1  | 3  | 0  | 3   | 3  | 0  | 15 | 5   | 0   | 3   | 2   | 0   | M   | M   | M   | M   | M   | M   | 1   | 1   |
| 1 | 1 | 13 | 1  | 1  | 0  | 0  | 16  | M  | 0  | 14 | 10  | 0   | 10  | 0   | 0   | M   | M   | M   | M   | M   | M   | 1   | 1   |
| 1 | 1 | 12 | 2  | 1  | 1  | 1  | 16  | M  | 0  | 13 | 3   | 0   | 2   | 1   | 0   | M   | M   | M   | M   | M   | M   | 1   | 1   |
| 1 | 1 | 9  | 1  | 0  | 0  | 0  | 134 | 5  | 0  | 15 | 25  | 0   | 25  | 0   | 0   | M   | M   | M   | M   | M   | M   | 1   | 0   |
| 1 | 1 | 12 | 1  | 0  | 4  | 0  | 16  | M  | 0  | 7  | 7   | 0   | 3   | 4   | 0   | M   | M   | M   | M   | M   | M   | 1   | 1   |
| 1 | 1 | 9  | 1  | 1  | 2  | 1  | 4   | 1  | 0  | 14 | 7   | 0   | 6   | 1   | 0   | M   | M   | M   | M   | M   | M   | 1   | 1   |
| 1 | 1 | 12 | 1  | 1  | 2  | 1  | 16  | M  | 0  | 15 | 3   | 8   | 1   | 3   | 0   | M   | M   | M   | M   | M   | M   | 1   | 0   |
| 1 | 1 | 7  | 2  | 1  | 2  | 1  | 16  | M  | 0  | 20 | 1   | 0   | 20  | 0   | 0   | M   | M   | M   | M   | M   | M   | 0   | M   |
| 1 | 1 | 12 | 1  | 1  | 2  | 1  | 16  | M  | 0  | 18 | 9   | 0   | 6   | 3   | 0   | M   | M   | M   | M   | M   | M   | 1   | 1   |
| 1 | 1 | 12 | 2  | 0  | 4  | 1  | 16  | M  | 0  | 16 | 5   | 0   | 2   | 3   | 0   | M   | M   | M   | M   | M   | M   | 1   | 1   |
| 1 | 1 | 12 | 1  | 1  | 3  | 1  | 16  | M  | 0  | 14 | 2   | 0   | 2   | 0   | 0   | M   | M   | M   | M   | M   | M   | 1   | 1   |
| 1 | 1 | 12 | 1  | 1  | 2  | 1  | 16  | M  | 0  | 17 | 14  | 0   | 14  | 0   | 0   | M   | M   | M   | M   | M   | M   | 1   | 1   |
| 1 | 1 | 5  | 1  | 1  | 2  | 1  | 16  | M  | 0  | 10 | 14  | 0   | 12  | 2   | 0   | M   | M   | M   | M   | M   | M   | 1   | 1   |
| 1 | 1 | 10 | 1  | 1  | 0  | 1  | 16  | M  | 0  | 10 | 14  | 0   | 9   | 5   | 0   | M   | M   | M   | M   | M   | M   | 1   | 1   |
| 1 | 1 | 9  | 1  | 1  | 0  | 0  | 16  | M  | 0  | 13 | 4   | 0   | 2   | 2   | 0   | M   | M   | M   | M   | M   | M   | 1   | 1   |
| 1 | 1 | 9  | 1  | 0  | 0  | 0  | 134 | 5  | 0  | 15 | 18  | 0   | 18  | 0   | 0   | 3   | 0   | M   | 6   | 3   | 1   | 1   | 0   |
| 1 | 1 | 12 | 1  | 1  | 2  | 1  | 16  | M  | 0  | 15 | 3   | 8   | 1   | 3   | 0   | 3   | 0   | M   | 6   | 3   | 1   | 1   | 0   |
| 1 | 1 | 7  | 2  | 1  | 2  | 1  | 16  | M  | 0  | 20 | 1   | 0   | 20  | 0   | 0   | M   | M   | M   | M   | M   | M   | 0   | M   |
| 1 | 1 | 13 | 1  | 1  | 0  | 2  | 16  | M  | 0  | 12 | 4   | 1   | 2   | 2   | 1   | 1   | M   | 1   | M   | 1   | 0   | 1   | 1   |
| 1 | 1 | 8  | 1  | 1  | 1  | 1  | 16  | M  | 0  | 11 | 4   | 2   | 1   | 1   | 1   | 4   | 0   | M   | 6   | 0   | 0   | 1   | 1   |
| 1 | 1 | 12 | 1  | 1  | 1  | 1  | 3   | 3  | 0  | 14 | 10  | 0   | 6   | 4   | 1   | 4   | 0   | M   | 6   | 0   | 0   | 1   | 0   |
| 1 | 1 | 7  | 1  | 1  | 1  | 1  | 16  | M  | 0  | 9  | 20  | 4   | 20  | 5   | 1   | 3   | 0   | M   | 6   | 0   | 1   | 1   | 1   |
| 1 | 1 | 13 | 1  | 1  | 2  | 1  | 16  | M  | 0  | 11 | 2   | 1   | 0   | 1   | 1   | 3   | 0   | M   | 6   | 3   | 0   | 1   | 1   |
| 1 | 1 | 3  | 1  | 0  | 4  | 0  | 16  | M  | 0  | 11 | 3   | 1   | 0   | 2   | 1   | 2   | 0   | M   | 1   | 2   | 1   | 1   | 1   |
| 1 | 1 | 12 | 1  | 1  | 0  | 2  | 16  | M  | 0  | 15 | 3   | 1   | 2   | 0   | 1   | 4   | 0   | M   | 6   | 0   | 0   | 0   | M   |
| 1 | 1 | 5  | 1  | 1  | 0  | 2  | 16  | M  | 0  | 8  | 1   | 3   | 1   | 0   | 1   | 2   | 0   | M   | 6   | 3   | 0   | 1   | 1   |
| 1 | 1 | 10 | 3  | 0  | 2  | 2  | 16  | M  | 0  | 12 | 9   | 4   | 5   | 0   | 1   | 3   | 0   | M   | 6   | 0   | 0   | 1   | 1   |
| 1 | 1 | 9  | 1  | 0  | 2  | 0  | 16  | M  | 0  | 12 | 16  | 3   | 15  | 0   | 1   | 3   | 0   | M   | 6   | 3   | 0   | 1   | 1   |
| 1 | 1 | 12 | 2  | 1  | 2  | 1  | 16  | M  | 0  | 9  | 13  | 1   | 8   | 4   | 1   | 3   | 0   | M   | 1   | 3   | 0   | 1   | 1   |
| 1 | 1 | 12 | 1  | 0  | 2  | 2  | 16  | M  | 0  | 15 | 16  | 5   | 12  | 4   | 1   | 3   | 0   | 1   | 6   | 3   | 0   | 1   | 1   |
| 1 | 1 | 11 | 1  | 1  | 2  | 1  | 16  | M  | 0  | 11 | 1   | 3   | 0   | 1   | 1   | 4   | 0   | M   | 6   | 0   | 1   | 1   | 0   |
| 1 | 1 | 4  | 1  | 0  | 4  | 0  | 16  | M  | 0  | 8  | 11  | 1   | 5   | 1   | 1   | 3   | 0   | M   | 6   | 3   | 0   | 1   | 1   |
| 1 | 1 | 12 | 1  | 1  | 2  | 1  | 16  | M  | 0  | 14 | 4   | 1   | 1   | 2   | 1   | 3   | 0   | M   | 88  | 3   | 1   | 1   | 1   |
| 1 | 1 | 7  | 1  | 1  | 1  | 1  | 16  | M  | 0  | 9  | 20  | 4   | 20  | 5   | 1   | 3   | 0   | M   | 6   | 0   | 1   | 1   | 1   |
| 1 | 1 | 10 | 1  | 1  | 2  | 1  | 16  | M  | 0  | 11 | 2   | 1   | 0   | 1   | 1   | 3   | 0   | M   | 6   | 3   | 0   | 1   | 1   |
| 1 | 1 | 10 | 1  | 1  | 0  | 2  | 16  | M  | 0  | 15 | 3   | 1   | 2   | 0   | 1   | 4   | 0   | M   | 6   | 0   | 0   | 0   | M   |
| 1 | 1 | 5  | 1  | 1  | 0  | 2  | 16  | M  | 0  | 8  | 1   | 3   | 1   | 0   | 1   | 2   | 0   | M   | 6   | 3   | 0   | 1   | 1   |
| 1 | 1 | 12 | 1  | 0  | 2  | 2  | 16  | M  | 0  | 15 | 16  | 5   | 12  | 4   | 1   | 3   | 0   | 1   | 6   | 3   | 0   | 1   | 1   |
| 1 | 1 | 10 | 1  | 1  | 2  | 1  | 16  | M  | 0  | 11 | 1   | 3   | 0   | 1   | 1   | 4   | 0   | M   | 6   | 0   | 1   | 1   | 0   |
| 1 | 1 | 12 | 1  | 1  | 2  | 1  | 16  | M  | 0  | 14 | 4   | 1   | 1   | 2   | 1   | 3   | 0   | M   | 88  | 3   | 1   | 1   | 1   |
| 1 | 1 | 10 | 1  | 1  | 0  | 1  | 16  | M  | 0  | 10 | 4   | 16  | 3   | 1   | 1   | 2   | 1   | 1   | M   | 2   | 0   | 1   | 1   |
| 1 | 1 | 12 | 3  | 1  | 1  | 1  | 16  | M  | 0  | 10 | 1   | 3   | 0   | 1   | 1   | 1   | 1   | 1   | M   | 1   | 1   | 1   | 1   |
| 1 | 1 | 7  | 1  | 1  | 2  | 1  | 16  | M  | 0  | 12 | 2   | 2   | 1   | 0   | 1   | 1   | 1   | 1   | M   | 1   | 0   | 1   | 1   |
| 1 | 1 | 10 | 1  | 1  | 0  | 1  | 16  | M  | 0  | 16 | 6   | 2   | 5   | 1   | 1   | 1   | 1   | 1   | M   | M   | 1   | 1   | 1   |

|   |   |    |   |   |   |   |    |   |   |    |    |   |    |    |   |   |   |   |   |   |   |   |   |
|---|---|----|---|---|---|---|----|---|---|----|----|---|----|----|---|---|---|---|---|---|---|---|---|
| 1 | 1 | 13 | 2 | 1 | 3 | 1 | 16 | M | 0 | 13 | 5  | 1 | 3  | 2  | 1 | 2 | 1 | 1 | M | 2 | 0 | 1 | 1 |
| 1 | 1 | 10 | 5 | 1 | 0 | 0 | 16 | M | 0 | 7  | 8  | 1 | 0  | 8  | 1 | 1 | 1 | 1 | M | M | 0 | 1 | 1 |
| 1 | 1 | 5  | 1 | 1 | 2 | 1 | 1  | 1 | 0 | 9  | 1  | 1 | 15 | 0  | 1 | 1 | 1 | 1 | M | 1 | 1 | 0 | M |
| 1 | 1 | 13 | 1 | 1 | 0 | 2 | 16 | M | 0 | 13 | 5  | M | 1  | 0  | 1 | 1 | 1 | 1 | M | 0 | 0 | 0 | M |
| 1 | 1 | 10 | 1 | 1 | 2 | 1 | 4  | 5 | 0 | 13 | 1  | 3 | 0  | 0  | 1 | 1 | 1 | 1 | M | 1 | 1 | 1 | 1 |
| 1 | 1 | 9  | 1 | 1 | 0 | 2 | 16 | M | 0 | 9  | 0  | 1 | 0  | 0  | 1 | 2 | 1 | 1 | M | 2 | 0 | 1 | 1 |
| 1 | 1 | 12 | 2 | 1 | 0 | 2 | 16 | M | 0 | 14 | 3  | 1 | 0  | 2  | 1 | 1 | 1 | 1 | M | 1 | 0 | 1 | 1 |
| 1 | 1 | 8  | 1 | 1 | 4 | 0 | 16 | M | 0 | 15 | 3  | 2 | 1  | 0  | 1 | 1 | 1 | 1 | M | 1 | 0 | 1 | 1 |
| 1 | 1 | 2  | 1 | 0 | 4 | 0 | 16 | M | 0 | 8  | 15 | 2 | 14 | 0  | 1 | 1 | 1 | 1 | M | 1 | 0 | 0 | M |
| 1 | 1 | 12 | 1 | 0 | 0 | 0 | 16 | M | 0 | 12 | 3  | 1 | 2  | 0  | 1 | 1 | 1 | 1 | M | 1 | 0 | 1 | 1 |
| 1 | 1 | 12 | 1 | 1 | 1 | 1 | 4  | 1 | 0 | 17 | 11 | 1 | 10 | 0  | 1 | 1 | 1 | 1 | M | 1 | 0 | 1 | 1 |
| 1 | 1 | 13 | 2 | 1 | 1 | 1 | 16 | M | 0 | 13 | 3  | 1 | 0  | 3  | 1 | 1 | 1 | 1 | M | M | 0 | 1 | 1 |
| 1 | 1 | 4  | 5 | 1 | 3 | 1 | 4  | 1 | 0 | 17 | 1  | 1 | 0  | 0  | 1 | 1 | 1 | 1 | M | 1 | 0 | 0 | M |
| 1 | 1 | 11 | 1 | 0 | 2 | 0 | 16 | M | 0 | 16 | 7  | 2 | 5  | 0  | 1 | 1 | 1 | 3 | M | 1 | 1 | 1 | 1 |
| 1 | 1 | 12 | 1 | 0 | 2 | 1 | 16 | M | 0 | 16 | 10 | 1 | 7  | 2  | 1 | 1 | 1 | 1 | M | 1 | 0 | 1 | 1 |
| 1 | 1 | 7  | 8 | 0 | 1 | 2 | 16 | M | 0 | 16 | 9  | 1 | 5  | 3  | 1 | 1 | 1 | 1 | M | 1 | 0 | 1 | 1 |
| 1 | 1 | 10 | 1 | 1 | 2 | 1 | 16 | M | 0 | 16 | 2  | 2 | 1  | 0  | 1 | 1 | 1 | 3 | M | 1 | 0 | 1 | 1 |
| 1 | 1 | 7  | 1 | 1 | 2 | 1 | 16 | M | 0 | 10 | 23 | 1 | 20 | 3  | 1 | 1 | 1 | 3 | M | M | 0 | 1 | 1 |
| 1 | 1 | 12 | 1 | 1 | 2 | 1 | 16 | M | 0 | 20 | 6  | 1 | 2  | 4  | 1 | 1 | 1 | 1 | M | 1 | 1 | 1 | 1 |
| 1 | 1 | 12 | 1 | 1 | 3 | 2 | 16 | M | 0 | 17 | 9  | 2 | 6  | 3  | 1 | 3 | 1 | 1 | M | 0 | 1 | 1 | 1 |
| 1 | 1 | 12 | 1 | 1 | 2 | 0 | 16 | M | 0 | 16 | 16 | 2 | 5  | 10 | 1 | 1 | 1 | 1 | M | 1 | 1 | 1 | 1 |
| 1 | 1 | 12 | 1 | 1 | 2 | 1 | 16 | M | 0 | 9  | 24 | 1 | 20 | 3  | 1 | 1 | 1 | 1 | M | 1 | 0 | 1 | 1 |
| 1 | 1 | 12 | 2 | 1 | 2 | 0 | 16 | M | 0 | 13 | 15 | 0 | 5  | 10 | 1 | 1 | 1 | 3 | M | 1 | 1 | 1 | 1 |
| 1 | 1 | 11 | 1 | 0 | 3 | 1 | 16 | M | 0 | 15 | 7  | 1 | 6  | 10 | 1 | 1 | 1 | 1 | M | 1 | 0 | 1 | 1 |
| 1 | 1 | 11 | 1 | 1 | 2 | 0 | 16 | M | 0 | 12 | 49 | 2 | 28 | 20 | 1 | 1 | 1 | 3 | M | 1 | 1 | 1 | 1 |
| 1 | 1 | 9  | 1 | 1 | 3 | 1 | 16 | M | 0 | 12 | 3  | 4 | 1  | 1  | 1 | 1 | 1 | 1 | M | 1 | 0 | 1 | 1 |
| 1 | 1 | 9  | 1 | 1 | 2 | 1 | 16 | M | 0 | 10 | 45 | 4 | 24 | 20 | 1 | 1 | 1 | 3 | M | 1 | 0 | 1 | 1 |
| 1 | 1 | 8  | 1 | 1 | 3 | 2 | 16 | M | 0 | 13 | 9  | 2 | 6  | 3  | 1 | 1 | 1 | 1 | M | M | 0 | 1 | 1 |
| 1 | 1 | 12 | 2 | 1 | 3 | 1 | 16 | M | 0 | 18 | 14 | 5 | 3  | 10 | 1 | 1 | 1 | 3 | M | 1 | 1 | 1 | 1 |
| 1 | 1 | 12 | 2 | 1 | 2 | 1 | 16 | M | 0 | 16 | 5  | 2 | 3  | 2  | 1 | 1 | 1 | 1 | M | 1 | 0 | 1 | 1 |
| 1 | 1 | 10 | 1 | 1 | 0 | 1 | 16 | M | 0 | 16 | 6  | 2 | 5  | 1  | 1 | 1 | 1 | 1 | M | M | 1 | 1 | 1 |
| 1 | 1 | 12 | 2 | 1 | 3 | 1 | 16 | M | 0 | 13 | 5  | 1 | 3  | 2  | 1 | 2 | 1 | 1 | M | 2 | 0 | 1 | 1 |
| 1 | 1 | 9  | 5 | 1 | 0 | 0 | 16 | M | 0 | 7  | 8  | 1 | 0  | 8  | 1 | 1 | 1 | 1 | M | M | 0 | 1 | 1 |
| 1 | 1 | 2  | 1 | 0 | 4 | 0 | 16 | M | 0 | 8  | 15 | 2 | 14 | 0  | 1 | 1 | 1 | 1 | M | 1 | 0 | 0 | M |
| 1 | 1 | 10 | 1 | 0 | 0 | 0 | 16 | M | 0 | 12 | 3  | 1 | 2  | 0  | 1 | 1 | 1 | 1 | M | 1 | 0 | 1 | 1 |
| 1 | 1 | 10 | 1 | 1 | 1 | 1 | 4  | 1 | 0 | 17 | 11 | 1 | 10 | 0  | 1 | 1 | 1 | 1 | M | 1 | 0 | 1 | 1 |
| 1 | 1 | 13 | 2 | 1 | 1 | 1 | 16 | M | 0 | 13 | 3  | 1 | 0  | 3  | 1 | 1 | 1 | 1 | M | M | 0 | 1 | 1 |
| 1 | 1 | 10 | 1 | 1 | 2 | 1 | 16 | M | 0 | 16 | 2  | 2 | 1  | 0  | 1 | 1 | 1 | 3 | M | 1 | 0 | 1 | 1 |
| 1 | 1 | 7  | 1 | 1 | 2 | 1 | 16 | M | 0 | 10 | 23 | 1 | 20 | 3  | 1 | 1 | 1 | 3 | M | M | 0 | 1 | 1 |
| 1 | 1 | 8  | 1 | 1 | 2 | 1 | 16 | M | 0 | 20 | 6  | 1 | 2  | 4  | 1 | 1 | 1 | 1 | M | 1 | 1 | 1 | 1 |
| 1 | 1 | 10 | 1 | 1 | 3 | 2 | 16 | M | 0 | 17 | 9  | 2 | 6  | 3  | 1 | 3 | 1 | 1 | M | 0 | 1 | 1 | 1 |
| 1 | 1 | 10 | 1 | 1 | 2 | 0 | 16 | M | 0 | 16 | 16 | 2 | 5  | 10 | 1 | 1 | 1 | 1 | M | 1 | 1 | 1 | 1 |
| 1 | 1 | 11 | 1 | 1 | 2 | 1 | 16 | M | 0 | 9  | 24 | 1 | 20 | 3  | 1 | 1 | 1 | 1 | M | 1 | 0 | 1 | 1 |
| 1 | 1 | 12 | 2 | 1 | 2 | 0 | 16 | M | 0 | 13 | 15 | 0 | 5  | 10 | 1 | 1 | 1 | 3 | M | 1 | 1 | 1 | 1 |

| P23 | P24 | P25 | P26 | P27 | P28 | P29 | P30 | P31 | P32 | P33 | P34 | P35 | P36 | P37 | P38 | P39 | P40 | P40b | P41 | P42 |
|-----|-----|-----|-----|-----|-----|-----|-----|-----|-----|-----|-----|-----|-----|-----|-----|-----|-----|------|-----|-----|
| 1   | M   | 1   | 1   | 15  | 1   | 1   | 9   | 5   | 1   | 1   | M   | 1   | 1   | 4   | 1   | 1   | 1   | 4    | 1   | 1   |
| 1   | M   | 1   | 0   | 20  | 1   | 1   | 2   | 2   | 1   | 1   | M   | 1   | 0   | 2   | 1   | 1   | 1   | 2    | 1   | 1   |
| 1   | M   | 1   | 1   | 18  | 1   | 4   | 3   | 2   | 1   | 1   | M   | 1   | 1   | 4   | 1   | 1   | 1   | 2    | 1   | 1   |
| 1   | M   | 1   | 0   | 23  | 1   | 1   | 10  | 0   | 1   | 1   | M   | 1   | 0   | 4   | 1   | 1   | 1   | M    | 1   | 1   |
| 1   | M   | 1   | 1   | 14  | 1   | 4   | 2   | 1   | 1   | 1   | M   | 1   | 1   | 4   | 1   | 1   | 1   | 1    | 1   | 1   |
| M   | 4   | 4   | 0   | 17  | 1   | 1   | 25  | 0   | 0   | M   | 4   | 3   | 1   | 2   | 0   | 1   | 0   | M    | 1   | 1   |
| 1   | M   | 1   | 0   | 23  | 1   | 1   | 3   | 4   | 1   | 1   | M   | 1   | 0   | 4   | 1   | 0   | 0   | M    | 1   | 1   |
| 1   | M   | 1   | 1   | 18  | 1   | 1   | 6   | 1   | 1   | 1   | M   | 1   | 1   | 4   | 1   | 0   | 0   | M    | 1   | 1   |
| M   | 1   | 3   | 0   | 16  | 1   | 1   | 6   | 9   | 1   | 1   | M   | 2   | 0   | 4   | 1   | 1   | 1   | 4    | 1   | 1   |
| M   | M   | M   | M   | 14  | 1   | 1   | 20  | 0   | 1   | 3   | M   | 1   | 0   | 4   | 1   | 0   | 0   | M    | 3   | 1   |
| 3   | M   | 1   | 1   | 18  | 1   | 1   | 6   | 3   | 1   | 1   | M   | 1   | 1   | 4   | 1   | 1   | 0   | M    | 3   | 1   |
| 3   | M   | 1   | 0   | 20  | 1   | 1   | 2   | 3   | 1   | 1   | M   | 1   | 0   | 4   | 1   | 1   | 1   | 4    | 1   | 1   |
| 1   | M   | 1   | 1   | 14  | 1   | 1   | 2   | 0   | 1   | 1   | M   | 1   | 0   | 4   | 1   | 0   | 1   | 4    | 1   | 1   |
| 1   | M   | 1   | 1   | 17  | 1   | 1   | 14  | 0   | 1   | 1   | M   | 1   | 1   | 4   | 1   | 1   | 1   | 4    | 1   | 1   |
| 3   | M   | 1   | 0   | 12  | 1   | 1   | 12  | 2   | 1   | 1   | M   | 1   | 0   | 4   | 1   | 1   | 0   | M    | 1   | 1   |
| 1   | M   | 1   | 1   | 15  | 1   | 1   | 9   | 5   | 1   | 1   | M   | 1   | 1   | 4   | 1   | 1   | 1   | 4    | 1   | 1   |
| 1   | M   | 1   | 0   | 20  | 1   | 1   | 2   | 2   | 1   | 1   | M   | 1   | 0   | 2   | 1   | 1   | 1   | 2    | 1   | 1   |
| M   | 4   | 4   | 0   | 17  | 1   | 1   | 18  | 0   | 1   | 1   | M   | 3   | 1   | 2   | 0   | 1   | 0   | M    | 1   | 1   |
| M   | 1   | 3   | 0   | 16  | 1   | 1   | 6   | 9   | 1   | 1   | M   | 2   | 0   | 4   | 1   | 1   | 1   | 4    | 1   | 1   |
| M   | M   | M   | M   | 14  | 1   | 1   | 20  | 0   | 1   | 3   | M   | 1   | 0   | 4   | 1   | 0   | 0   | M    | 3   | 1   |
| 1   | M   | 1   | 0   | 16  | 1   | 1   | 2   | 2   | 1   | 1   | M   | 1   | 1   | 4   | 1   | 1   | 1   | 2    | 2   | 1   |
| 1   | M   | 1   | 1   | 16  | 1   | 1   | 1   | 3   | 1   | 1   | M   | 1   | 1   | 2   | 0   | 1   | 1   | 2    | 1   | 1   |
| M   | 1   | 2   | 1   | 17  | 1   | 1   | 6   | 4   | 1   | 1   | M   | 1   | 1   | 4   | 1   | 1   | 1   | 2    | 1   | 1   |
| 3   | M   | 1   | 0   | 9   | 1   | 14  | 20  | 4   | 1   | 1   | M   | 1   | 0   | 4   | 1   | 1   | 1   | 2    | 1   | 1   |
| 3   | M   | 1   | 1   | 20  | 1   | 4   | 0   | 2   | 1   | 1   | M   | M   | 0   | 4   | 0   | 1   | 1   | 1    | 1   | 1   |
| 1   | M   | 1   | 1   | 11  | 1   | 4   | 0   | 3   | 1   | 1   | M   | 1   | 0   | 4   | 1   | 1   | 1   | M    | 1   | 2   |
| M   | M   | M   | M   | 15  | 1   | 1   | 2   | 1   | 1   | 1   | M   | 2   | 0   | 4   | 1   | 1   | 0   | M    | 1   | 2   |
| 1   | M   | 2   | 1   | 15  | 1   | 4   | 1   | 0   | 0   | M   | 1   | 3   | 0   | 4   | 0   | 1   | 0   | M    | 1   | 1   |
| 1   | M   | 1   | 1   | 15  | 1   | 4   | 5   | 4   | 1   | 3   | M   | 1   | 1   | 4   | 1   | 1   | 1   | 1    | 1   | 1   |
| 1   | M   | 1   | 0   | 15  | 1   | 5   | 15  | 1   | 1   | 3   | M   | 1   | 0   | 4   | 1   | 1   | 0   | M    | 1   | 1   |
| 3   | M   | 1   | 1   | 15  | 1   | 1   | 8   | 5   | 1   | 1   | M   | 1   | 1   | 4   | 1   | 1   | 1   | 1    | 3   | 1   |
| 3   | M   | 1   | 0   | 17  | 1   | 1   | 12  | 4   | 1   | 1   | M   | 1   | 0   | 4   | 1   | 1   | 1   | 4    | 1   | 1   |
| M   | 88  | 3   | 0   | 14  | 1   | 1   | 0   | 1   | 0   | M   | 88  | 4   | 0   | 4   | 0   | 1   | 1   | 4    | 1   | 1   |
| 3   | M   | 2   | 0   | 15  | 1   | 1   | 5   | 6   | 1   | 1   | M   | 1   | 0   | 4   | 1   | 1   | 0   | M    | 1   | 1   |
| 1   | M   | 1   | 1   | 15  | 1   | 1   | 1   | 3   | 1   | 1   | M   | 1   | 1   | 4   | 0   | 1   | 1   | 4    | 1   | 1   |
| 3   | M   | 1   | 0   | 9   | 1   | 14  | 20  | 4   | 1   | 1   | M   | 1   | 0   | 4   | 1   | 1   | 1   | 2    | 1   | 1   |
| 3   | M   | 1   | 1   | 20  | 1   | 4   | 0   | 2   | 1   | 1   | M   | M   | 0   | 4   | 0   | 1   | 1   | 1    | 1   | 1   |
| M   | M   | M   | M   | 15  | 1   | 1   | 2   | 1   | 1   | 1   | M   | 2   | 0   | 4   | 1   | 1   | 0   | M    | 1   | 2   |
| 1   | M   | 2   | 1   | 15  | 1   | 4   | 1   | 0   | 0   | M   | 1   | 3   | 0   | 4   | 0   | 1   | 0   | M    | 1   | 1   |
| 3   | M   | 1   | 0   | 17  | 1   | 1   | 12  | 4   | 1   | 1   | M   | 1   | 0   | 4   | 1   | 1   | 1   | 4    | 1   | 1   |
| M   | 88  | 3   | 0   | 14  | 1   | 1   | 0   | 1   | 0   | M   | 88  | 4   | 0   | 4   | 0   | 1   | 1   | 4    | 1   | 1   |
| 1   | M   | 1   | 1   | 15  | 1   | 1   | 1   | 3   | 1   | 1   | M   | 1   | 1   | 4   | 0   | 1   | 1   | 4    | 1   | 1   |
| 1   | M   | 1   | 1   | 8   | 1   | 2   | 3   | 1   | 1   | 1   | M   | 1   | 1   | 4   | 1   | 1   | 1   | 2    | 1   | 1   |
| 1   | M   | 1   | 1   | 19  | 1   | 4   | 0   | 2   | 1   | 1   | M   | 1   | 1   | 4   | 1   | 1   | 1   | 2    | 1   | 3   |
| 1   | M   | 1   | 1   | 16  | 1   | 3   | 1   | 1   | 1   | 1   | M   | 1   | 0   | 4   | 1   | 1   | 1   | 2    | 1   | 1   |
| 1   | M   | 1   | 1   | 17  | 1   | 1   | 5   | 1   | 1   | 1   | M   | 1   | 0   | 4   | 1   | 0   | 1   | 4    | 1   | 1   |

|   |   |   |   |    |   |   |    |    |   |   |   |   |   |   |   |   |   |   |    |   |
|---|---|---|---|----|---|---|----|----|---|---|---|---|---|---|---|---|---|---|----|---|
| 2 | M | 2 | 0 | 16 | 1 | 2 | 5  | 2  | 1 | 1 | M | 2 | 0 | 4 | 1 | 1 | 1 | 4 | 1  | 1 |
| 1 | M | 1 | 0 | 18 | 1 | 1 | 0  | 8  | 1 | 1 | M | M | 0 | 4 | 1 | 1 | 1 | M | 1  | 1 |
| M | M | M | M | 20 | 1 | 1 | 15 | 1  | 1 | 2 | M | 1 | 1 | 4 | 1 | 1 | 1 | M | 1  | 1 |
| M | M | M | M | 14 | 1 | 4 | 5  | 0  | 1 | 1 | M | 1 | 1 | 4 | 1 | 1 | 1 | 1 | 1  | 1 |
| 1 | M | 1 | 1 | 13 | 1 | 3 | 0  | 1  | 1 | 1 | M | 1 | 1 | 4 | 1 | 1 | 1 | 1 | 1  | 1 |
| 1 | M | 1 | 1 | 17 | 1 | 1 | 0  | 0  | 1 | 1 | M | 1 | 0 | 4 | 1 | 1 | 0 | M | 1  | 1 |
| 1 | M | 1 | 1 | 18 | 1 | 1 | 0  | 3  | 1 | 1 | M | M | 0 | 4 | 1 | 1 | 0 | M | 1  | 1 |
| 1 | M | 1 | 1 | 15 | 1 | 4 | 1  | 2  | 1 | 1 | M | 1 | 0 | 4 | 1 | 1 | 0 | M | 1  | 1 |
| M | M | M | M | 15 | 1 | 1 | 14 | 1  | 1 | 1 | M | 1 | 0 | 4 | 1 | 1 | 1 | 1 | 1  | 1 |
| 1 | M | 1 | 0 | 16 | 1 | 1 | 2  | 1  | 1 | 1 | M | 1 | 0 | 4 | 1 | 1 | 1 | 4 | 1  | 1 |
| 1 | M | 1 | 1 | 18 | 1 | 1 | 10 | 1  | 1 | 1 | M | 1 | 1 | 4 | 1 | 1 | 1 | 4 | 1  | 1 |
| 3 | M | 1 | 1 | 15 | 1 | 4 | 0  | 3  | 1 | 1 | M | 1 | 1 | 4 | 1 | 1 | 1 | 3 | 3  | 1 |
| M | M | M | M | 22 | 1 | 1 | 0  | 1  | 1 | 1 | M | 1 | 0 | 4 | 1 | 1 | 1 | 2 | 1  | 1 |
| 1 | M | 1 | 1 | 16 | 1 | 1 | 5  | 2  | 1 | 1 | M | 1 | 1 | 4 | 1 | 1 | 1 | 4 | 1  | 1 |
| 3 | M | 1 | 1 | 18 | 1 | 4 | 7  | 2  | 1 | 1 | M | 1 | 1 | 4 | 1 | 1 | 1 | 2 | 1  | 1 |
| 1 | M | 1 | 0 | 18 | 1 | 1 | 5  | 3  | 1 | 1 | M | 1 | 0 | 4 | 1 | 1 | 1 | 2 | 1  | 1 |
| 3 | M | 1 | 0 | 16 | 1 | 1 | 1  | 1  | 1 | 3 | M | 1 | 0 | 4 | 1 | 1 | 1 | 4 | 12 | 1 |
| 2 | M | 1 | 0 | 15 | 1 | 1 | 20 | 3  | 1 | 1 | M | 1 | 1 | 4 | 1 | 1 | 0 | M | 1  | 1 |
| 1 | M | 1 | 1 | 22 | 1 | 4 | 2  | 4  | 1 | 2 | M | 1 | 1 | 4 | 1 | 1 | 0 | M | 1  | 1 |
| 1 | M | 1 | 1 | 16 | 1 | 1 | 6  | 3  | 1 | 1 | M | 1 | 1 | 4 | 1 | 1 | 1 | 4 | 1  | 3 |
| 1 | M | 1 | 0 | 18 | 1 | 5 | 5  | 11 | 1 | 1 | M | 1 | 0 | 4 | 1 | 1 | 0 | M | 1  | 2 |
| 1 | M | 1 | 0 | 20 | 1 | 4 | 20 | 3  | 1 | 1 | M | 1 | 1 | 4 | 1 | 1 | 1 | 4 | 1  | 1 |
| 1 | M | 1 | 1 | 15 | 1 | 1 | 5  | 10 | 1 | 3 | M | 1 | 1 | 4 | 1 | 0 | 1 | 4 | 1  | 1 |
| 1 | M | 1 | 1 | 17 | 1 | 1 | 6  | 1  | 1 | 3 | M | 1 | 0 | 4 | 1 | 1 | 1 | 4 | 1  | 3 |
| 3 | M | 1 | 1 | 13 | 1 | 1 | 28 | 21 | 1 | 1 | M | 1 | 1 | 4 | 1 | 1 | 1 | 4 | 1  | 1 |
| 1 | M | 1 | 1 | 14 | 1 | 1 | 1  | 2  | 1 | 2 | M | 1 | 0 | 4 | 1 | 1 | 0 | M | 2  | 1 |
| 1 | M | 1 | 1 | 13 | 1 | 1 | 24 | 21 | 1 | 1 | M | 1 | 0 | 4 | 1 | 1 | 1 | 4 | 1  | 1 |
| 1 | M | 1 | 0 | 14 | 1 | 1 | 6  | 3  | 1 | 2 | M | 1 | 0 | 4 | 1 | 1 | 0 | M | 2  | 1 |
| 1 | M | 1 | 1 | 19 | 1 | 1 | 3  | 11 | 1 | 1 | M | 1 | 0 | 4 | 1 | 1 | 1 | 4 | 3  | 2 |
| 1 | M | 1 | 1 | 16 | 1 | 1 | 3  | 2  | 1 | 1 | M | 1 | 1 | 4 | 1 | 1 | 1 | 4 | 1  | 1 |
| 1 | M | 1 | 1 | 17 | 1 | 1 | 5  | 1  | 1 | 1 | M | 1 | 0 | 4 | 1 | 0 | 1 | 4 | 1  | 1 |
| 2 | M | 2 | 0 | 16 | 1 | 2 | 5  | 2  | 1 | 1 | M | 2 | 0 | 4 | 1 | 1 | 1 | 4 | 1  | 1 |
| 1 | M | 1 | 0 | 18 | 1 | 1 | 0  | 8  | 1 | 1 | M | M | 0 | 4 | 1 | 1 | 1 | M | 1  | 1 |
| M | M | M | M | 15 | 1 | 1 | 14 | 1  | 1 | 1 | M | 1 | 0 | 4 | 1 | 1 | 1 | 1 | 1  | 1 |
| 1 | M | 1 | 0 | 16 | 1 | 1 | 2  | 1  | 1 | 1 | M | 1 | 0 | 4 | 1 | 1 | 1 | 4 | 1  | 1 |
| 1 | M | 1 | 1 | 18 | 1 | 1 | 10 | 1  | 1 | 1 | M | 1 | 1 | 4 | 1 | 1 | 1 | 4 | 1  | 1 |
| 3 | M | 1 | 1 | 15 | 1 | 4 | 0  | 3  | 1 | 1 | M | 1 | 1 | 4 | 1 | 1 | 1 | 3 | 3  | 1 |
| 3 | M | 1 | 0 | 16 | 1 | 1 | 1  | 1  | 1 | 3 | M | 1 | 0 | 4 | 1 | 1 | 1 | 4 | 12 | 1 |
| 2 | M | 1 | 0 | 15 | 1 | 1 | 20 | 3  | 1 | 1 | M | 1 | 1 | 4 | 1 | 1 | 0 | M | 1  | 1 |
| 1 | M | 1 | 1 | 22 | 1 | 4 | 2  | 4  | 1 | 2 | M | 1 | 1 | 4 | 1 | 1 | 0 | M | 1  | 1 |
| 1 | M | 1 | 1 | 16 | 1 | 1 | 6  | 3  | 1 | 1 | M | 1 | 1 | 4 | 1 | 1 | 1 | 4 | 1  | 3 |
| 1 | M | 1 | 0 | 18 | 1 | 5 | 5  | 11 | 1 | 1 | M | 1 | 0 | 4 | 1 | 1 | 0 | M | 1  | 2 |
| 1 | M | 1 | 0 | 20 | 1 | 4 | 20 | 3  | 1 | 1 | M | 1 | 1 | 4 | 1 | 1 | 1 | 4 | 1  | 1 |
| 1 | M | 1 | 1 | 15 | 1 | 1 | 5  | 10 | 1 | 3 | M | 1 | 1 | 4 | 1 | 0 | 1 | 4 | 1  | 1 |

| P43 | P44 | P45 | P46 | P47 | P48 | P49 | P50 | P51 | P52 | P53 | P54 | P55 | P56 | P57 | P58 | P59 | P60 | P61 | P62 | P63 |
|-----|-----|-----|-----|-----|-----|-----|-----|-----|-----|-----|-----|-----|-----|-----|-----|-----|-----|-----|-----|-----|
| 1   | 2   | 0   | 1   | 3   | 1   | 5   | 2   | 1   | 0   | M   | 0   | M   | 0   | M   | 1   | 1   | 0   | 1   | 12  | 6   |
| 3   | 1   | 0   | 1   | 2   | 1   | 1   | 2   | 1   | 0   | M   | 0   | M   | 1   | 2   | 1   | M   | 0   | 1   | 12  | 4   |
| 3   | 2   | 0   | 1   | 3   | 1   | 4   | 2   | 1   | 1   | 1   | 0   | M   | 1   | 3   | 1   | M   | 0   | 1   | 25  | 25  |
| 3   | 3   | 0   | 1   | 3   | 1   | 4   | 2   | 1   | 0   | M   | 0   | M   | 0   | M   | 1   | M   | 0   | 1   | 30  | 88  |
| 1   | 2   | 0   | 1   | 3   | 1   | 2   | 2   | 1   | 0   | M   | 0   | M   | 0   | M   | 1   | M   | 0   | 1   | 8   | 88  |
| 1   | 1   | 1   | 1   | 3   | 1   | 1   | 2   | 2   | 0   | M   | 0   | M   | 0   | M   | 1   | M   | 0   | 1   | 1   | 3   |
| 1   | 2   | 0   | 1   | 4   | 1   | 6   | 1   | 1   | 0   | M   | 0   | M   | 1   | 1   | 1   | M   | 0   | 1   | 30  | 2   |
| 2   | 2   | 1   | 0   | 3   | 1   | 5   | 2   | 1   | 0   | M   | 0   | M   | 0   | M   | 1   | M   | 0   | 1   | 56  | 88  |
| 1   | 3   | 0   | 0   | 1   | 1   | 2   | 1   | 1   | 0   | M   | 0   | M   | 0   | M   | 1   | M   | 0   | 1   | 20  | 7   |
| 2   | 2   | 1   | 1   | 4   | 1   | 5   | 1   | 1   | 0   | M   | 0   | M   | 0   | M   | 1   | M   | 0   | 1   | 15  | 88  |
| 1   | 1   | 0   | 0   | 5   | 0   | M   | 2   | 1   | 0   | M   | 1   | 0   | 0   | M   | 0   | 2   | 0   | 1   | 20  | 7   |
| 2   | 3   | 0   | 1   | 3   | 1   | 1   | 2   | 1   | 0   | M   | 0   | M   | 0   | M   | 1   | M   | 0   | 1   | 6   | 25  |
| 1   | 3   | 0   | 0   | 1   | 1   | 1   | 1   | 1   | 0   | M   | 1   | 1   | 0   | M   | 1   | M   | 0   | 1   | 30  | 2   |
| 2   | 2   | 0   | 0   | 1   | 1   | 1   | 2   | 1   | 0   | M   | 0   | M   | 0   | M   | 1   | M   | 0   | 1   | 30  | 88  |
| 1   | 3   | 88  | 0   | 3   | 0   | M   | 1   | 1   | 0   | M   | 0   | M   | 0   | M   | 1   | M   | 0   | 1   | 20  | 88  |
| 1   | 2   | 0   | 1   | 3   | 1   | 5   | 2   | 1   | 0   | M   | 0   | M   | 0   | M   | 1   | 1   | 0   | 1   | 12  | 6   |
| 3   | 1   | 0   | 1   | 2   | 1   | 1   | 2   | 1   | 0   | M   | 0   | M   | 1   | 2   | 1   | M   | 0   | 1   | 12  | 4   |
| 1   | 1   | 1   | 1   | 3   | 1   | 1   | 2   | 2   | 0   | M   | 0   | M   | 0   | M   | 1   | M   | 0   | 1   | 1   | 3   |
| 1   | 3   | 0   | 0   | 1   | 1   | 2   | 1   | 1   | 0   | M   | 0   | M   | 0   | M   | 1   | M   | 0   | 1   | 20  | 7   |
| 2   | 2   | 1   | 1   | 4   | 1   | 5   | 1   | 1   | 0   | M   | 0   | M   | 0   | M   | 1   | M   | 0   | 1   | 15  | 88  |
| 1   | 2   | 0   | 1   | 1   | 1   | 2   | 1   | 1   | 0   | M   | 0   | M   | 0   | M   | 0   | 2   | 0   | 1   | 15  | 3   |
| 2   | 3   | 0   | 1   | 3   | 0   | M   | 2   | 1   | 0   | M   | 0   | M   | 0   | M   | 0   | 4   | 0   | 1   | 35  | 25  |
| 2   | 3   | 1   | 1   | 1   | 1   | 2   | 2   | 1   | 0   | M   | 0   | M   | 0   | M   | 1   | M   | 0   | 1   | 15  | 3   |
| 1   | 2   | 0   | 1   | 3   | 1   | 2   | 2   | 1   | 0   | M   | 0   | M   | 0   | M   | 1   | M   | 0   | 1   | 25  | 4   |
| 3   | 2   | 0   | 1   | 3   | 1   | 5   | 2   | 1   | 0   | M   | 0   | M   | 0   | M   | 1   | M   | 0   | 1   | 20  | 4   |
| 2   | 2   | 1   | 1   | 1   | 1   | 2   | 1   | 1   | 0   | M   | 0   | M   | 0   | M   | 0   | 2   | 0   | 1   | 15  | 2   |
| 1   | 3   | 0   | 1   | 1   | 1   | 2   | 1   | 1   | 0   | M   | 0   | M   | 0   | M   | 1   | M   | 0   | 1   | 20  | 4   |
| 1   | 2   | 1   | 1   | 1   | 1   | 4   | 2   | 0   | 0   | M   | 0   | M   | 0   | M   | 1   | M   | 0   | 1   | 15  | 2   |
| 1   | 2   | 0   | 1   | 2   | 1   | 5   | 2   | 1   | 0   | M   | 0   | M   | 0   | M   | 1   | M   | 0   | 1   | 20  | 4   |
| 1   | 3   | 0   | 1   | 1   | 1   | 1   | 1   | 1   | 0   | M   | 0   | M   | 0   | M   | 1   | M   | 0   | 1   | 30  | 20  |
| 1   | 2   | 0   | 1   | 4   | 1   | 1   | 2   | 1   | 0   | M   | 0   | M   | 0   | M   | 1   | M   | 0   | 1   | 30  | 25  |
| 2   | 3   | 1   | 0   | 1   | 1   | 4   | 1   | 1   | 0   | M   | 0   | M   | 0   | M   | 1   | M   | 0   | 1   | 30  | 20  |
| 1   | 2   | 0   | 1   | 3   | 1   | 2   | 2   | 0   | 0   | M   | 0   | M   | 0   | M   | 1   | M   | 0   | 1   | 56  | 4   |
| 1   | 1   | 0   | 1   | 3   | 1   | 2   | 2   | 1   | 0   | M   | 0   | M   | 0   | M   | 0   | 4   | 0   | 1   | 20  | 2   |
| 1   | 3   | 0   | 1   | 3   | 1   | 3   | 1   | 1   | 0   | M   | 0   | M   | 0   | M   | 1   | M   | 0   | 1   | 30  | 25  |
| 1   | 2   | 0   | 1   | 3   | 1   | 2   | 2   | 1   | 0   | M   | 0   | M   | 0   | M   | 1   | M   | 0   | 1   | 25  | 4   |
| 3   | 2   | 0   | 1   | 3   | 1   | 5   | 2   | 1   | 0   | M   | 0   | M   | 0   | M   | 1   | M   | 0   | 1   | 20  | 4   |
| 1   | 3   | 0   | 1   | 1   | 1   | 2   | 1   | 1   | 0   | M   | 0   | M   | 0   | M   | 1   | M   | 0   | 1   | 20  | 4   |
| 1   | 2   | 1   | 1   | 1   | 1   | 4   | 2   | 0   | 0   | M   | 0   | M   | 0   | M   | 1   | M   | 0   | 1   | 15  | 2   |
| 2   | 3   | 1   | 0   | 1   | 1   | 4   | 1   | 1   | 0   | M   | 0   | M   | 0   | M   | 1   | M   | 0   | 1   | 30  | 20  |
| 1   | 2   | 0   | 1   | 3   | 1   | 2   | 2   | 0   | 0   | M   | 0   | M   | 0   | M   | 1   | M   | 0   | 1   | 56  | 4   |
| 1   | 3   | 0   | 1   | 3   | 1   | 3   | 1   | 1   | 0   | M   | 0   | M   | 0   | M   | 1   | M   | 0   | 1   | 30  | 25  |
| 2   | 3   | 0   | 0   | 3   | 0   | M   | 1   | 2   | 0   | M   | 0   | M   | 0   | M   | 1   | M   | 0   | 1   | 15  | 4   |
| 1   | 2   | 0   | 0   | 1   | 1   | 2   | 2   | 1   | 1   | 2   | 0   | M   | 1   | 2   | 0   | 4   | 0   | 1   | 25  | 3   |
| 1   | 2   | 0   | 1   | 3   | 1   | 2   | 2   | 1   | 0   | M   | 0   | M   | 0   | M   | 1   | M   | 0   | 1   | 8   | 88  |
| 1   | 2   | 0   | 1   | 1   | 1   | 1   | 2   | 1   | 0   | M   | 0   | M   | 0   | M   | 1   | M   | 0   | 1   | 12  | 3   |

|   |   |   |   |   |   |    |   |   |   |   |   |    |   |   |    |   |   |   |    |    |   |
|---|---|---|---|---|---|----|---|---|---|---|---|----|---|---|----|---|---|---|----|----|---|
| 1 | 2 | 1 | 1 | 3 | 1 | 2  | 1 | 1 | 0 | M | 0 | M  | 0 | M | 1  | M | 0 | 1 | 20 | 4  |   |
| 1 | 1 | 0 | 1 | 3 | 1 | 2  | 2 | 1 | 0 | M | 0 | M  | 0 | M | 0  | 4 | 0 | 1 | 20 | 2  |   |
| 1 | 3 | 0 | 1 | 3 | 1 | 5  | 2 | 1 | 0 | M | 0 | M  | 1 | M | 0  | 4 | 0 | 1 | 35 | 2  |   |
| 1 | 2 | 0 | 0 | 1 | 1 | 88 | 2 | 1 | 0 | M | 0 | M  | 0 | M | 1  | M | 0 | 1 | 20 | 2  |   |
| 2 | 1 | 0 | 0 | 3 | 1 | 2  | 2 | 1 | 1 | 2 | 0 | M  | 1 | 2 | 0  | 1 | 0 | 1 | 12 | 2  |   |
| 2 | 3 | 1 | 0 | 1 | 0 | M  | 1 | 2 | 0 | M | 0 | M  | 0 | M | 1  | M | 0 | 1 | 8  | 88 |   |
| 1 | 2 | 1 | 1 | 1 | 1 | 2  | 1 | 1 | 0 | M | 0 | M  | 0 | M | 1  | M | 0 | 1 | 24 | 25 |   |
| 1 | 2 | 1 | 1 | 1 | 1 | 5  | 2 | 1 | 0 | M | 0 | M  | 0 | M | 1  | M | 0 | 1 | 20 | 25 |   |
| 1 | 3 | 0 | 1 | 1 | 1 | 0  | M | 1 | 1 | 0 | M | 0  | M | 0 | M  | 1 | M | 0 | 1  | 20 | 3 |
| 1 | 3 | 0 | 1 | 1 | 1 | 1  | 2 | 1 | 0 | M | 0 | M  | 0 | M | 0  | 1 | 0 | 1 | 25 | 6  |   |
| 1 | 3 | 0 | 1 | 1 | 1 | 2  | 2 | 1 | 0 | M | 0 | M  | 0 | M | 1  | M | 0 | 1 | 12 | 20 |   |
| 2 | 3 | 0 | 0 | 3 | 0 | M  | 2 | 1 | 0 | M | 0 | M  | 0 | M | 1  | M | 0 | 1 | 20 | 3  |   |
| 3 | 2 | 0 | 1 | 3 | 1 | 4  | 1 | 1 | 0 | M | 0 | M  | 0 | M | 1  | M | 0 | 1 | 25 | 3  |   |
| 1 | 3 | 0 | 1 | 3 | 1 | 4  | 2 | 1 | 0 | M | 0 | M  | 0 | M | 1  | M | 1 | 1 | 25 | 0  |   |
| 1 | 1 | 0 | 0 | 1 | 1 | 1  | 2 | 1 | 0 | M | 1 | 0  | 1 | 2 | 1  | M | 0 | 1 | 20 | 88 |   |
| 1 | 3 | 0 | 1 | 4 | 1 | 2  | 1 | 1 | 0 | M | 0 | M  | 0 | M | 0  | 4 | 0 | 1 | 20 | 4  |   |
| 1 | 3 | 0 | 1 | 1 | 0 | M  | 1 | 1 | 0 | M | 0 | M  | 0 | M | 1  | M | 0 | 1 | 20 | 20 |   |
| 1 | 3 | 0 | 0 | 3 | 0 | M  | 1 | 1 | 0 | M | 0 | M  | 0 | M | 1  | M | 0 | 1 | 15 | 2  |   |
| 1 | 3 | 0 | 1 | 1 | 1 | 2  | 2 | 0 | 0 | M | 1 | 88 | 0 | M | 1  | M | 0 | 1 | 30 | 2  |   |
| 2 | 2 | 0 | 0 | 2 | 1 | 1  | 2 | 1 | 0 | M | 0 | M  | 0 | M | 1  | M | 0 | 1 | 30 | 7  |   |
| 1 | 2 | 0 | 1 | 1 | 1 | 2  | 2 | 1 | 0 | M | 0 | M  | 0 | M | 88 | 1 | 0 | 1 | 30 | 20 |   |
| 1 | 3 | 0 | 1 | 1 | 0 | M  | 2 | 1 | 0 | M | 0 | M  | 0 | M | 1  | M | 0 | 1 | 30 | 20 |   |
| 1 | 3 | 0 | 1 | 1 | 0 | M  | 2 | 1 | 0 | M | 0 | M  | 0 | M | 1  | M | 0 | 1 | 20 | 7  |   |
| 2 | 3 | 0 | 0 | 1 | 0 | M  | 1 | 1 | 0 | M | 0 | M  | 0 | M | 1  | M | 0 | 1 | 30 | 20 |   |
| 1 | 3 | 0 | 1 | 1 | 1 | 1  | 1 | 1 | 0 | M | 0 | M  | 1 | 1 | 1  | M | 0 | 1 | 25 | 88 |   |
| 2 | 3 | 0 | 1 | 1 | 1 | 4  | 1 | 1 | 0 | M | 0 | M  | 0 | M | 1  | M | 0 | 1 | 20 | 88 |   |
| 2 | 2 | 0 | 1 | 1 | 1 | 1  | 2 | 1 | 0 | M | 0 | M  | 0 | M | 1  | M | 0 | 1 | 20 | 88 |   |
| 2 | 2 | 0 | 1 | 1 | 1 | 1  | 1 | 1 | 0 | M | 0 | M  | 0 | M | 1  | M | 0 | 1 | 20 | 2  |   |
| 2 | 3 | 0 | 0 | 3 | 0 | M  | 1 | 1 | 0 | M | 0 | M  | 0 | M | 1  | M | 0 | 1 | 20 | 88 |   |
| 1 | 2 | 0 | 1 | 2 | 0 | M  | 2 | 1 | 0 | M | 0 | M  | 0 | M | 1  | M | 0 | 1 | 30 | 25 |   |
| 1 | 2 | 0 | 1 | 1 | 1 | 1  | 2 | 1 | 0 | M | 0 | M  | 0 | M | 1  | M | 0 | 1 | 12 | 3  |   |
| 1 | 2 | 1 | 1 | 3 | 1 | 2  | 1 | 1 | 0 | M | 0 | M  | 0 | M | 1  | M | 0 | 1 | 20 | 4  |   |
| 1 | 1 | 0 | 1 | 3 | 1 | 2  | 2 | 1 | 0 | M | 0 | M  | 0 | M | 0  | 4 | 0 | 1 | 20 | 2  |   |
| 1 | 3 | 0 | 1 | 1 | 0 | M  | 1 | 1 | 0 | M | 0 | M  | 0 | M | 1  | M | 0 | 1 | 20 | 3  |   |
| 1 | 3 | 0 | 1 | 1 | 1 | 1  | 2 | 1 | 0 | M | 0 | M  | 0 | M | 0  | 1 | 0 | 1 | 25 | 6  |   |
| 1 | 3 | 0 | 1 | 1 | 1 | 2  | 2 | 1 | 0 | M | 0 | M  | 0 | M | 1  | M | 0 | 1 | 12 | 20 |   |
| 2 | 3 | 0 | 0 | 3 | 0 | M  | 2 | 1 | 0 | M | 0 | M  | 0 | M | 1  | M | 0 | 1 | 20 | 3  |   |
| 1 | 3 | 0 | 1 | 1 | 0 | M  | 1 | 1 | 0 | M | 0 | M  | 0 | M | 1  | M | 0 | 1 | 20 | 20 |   |
| 1 | 3 | 0 | 0 | 3 | 0 | M  | 1 | 1 | 0 | M | 0 | M  | 0 | M | 1  | M | 0 | 1 | 15 | 2  |   |
| 1 | 3 | 0 | 1 | 1 | 1 | 2  | 2 | 0 | 0 | M | 1 | 88 | 0 | M | 1  | M | 0 | 1 | 30 | 2  |   |
| 2 | 2 | 0 | 0 | 2 | 1 | 1  | 2 | 1 | 0 | M | 0 | M  | 0 | M | 1  | M | 0 | 1 | 30 | 7  |   |
| 1 | 2 | 0 | 1 | 1 | 1 | 2  | 2 | 1 | 0 | M | 0 | M  | 0 | M | 88 | 1 | 0 | 1 | 30 | 20 |   |
| 1 | 3 | 0 | 1 | 1 | 0 | M  | 2 | 1 | 0 | M | 0 | M  | 0 | M | 1  | M | 0 | 1 | 30 | 20 |   |
| 1 | 3 | 0 | 1 | 1 | 0 | M  | 2 | 1 | 0 | M | 0 | M  | 0 | M | 1  | M | 0 | 1 | 20 | 7  |   |

| P64 | P65 | P66 | P67 | P68 | P69 | P70 | P71 | P72 | P73 | P74 | P75 |
|-----|-----|-----|-----|-----|-----|-----|-----|-----|-----|-----|-----|
| 0   | 1   | 0   | 1   | 1   | 1   | 1   | 1   | 0   | 1   | 0   | 88  |
| 1   | 0   | 1   | 1   | 8   | 1   | 1   | 1   | 0   | 1   | 0   | 0   |
| 0   | 1   | 0   | 1   | 1   | 1   | 1   | 1   | 1   | 1   | 1   | 1   |
| 0   | 0   | 1   | 2   | M   | M   | M   | 1   | 1   | 1   | 0   | 0   |
| 1   | 1   | 1   | 1   | 1   | 0   | 1   | 1   | 0   | 1   | 0   | 0   |
| 1   | 0   | 0   | 1   | 7   | 1   | 0   | 1   | 1   | 1   | 0   | 0   |
| 0   | 0   | 0   | 1   | 9   | 1   | 1   | 1   | 0   | 0   | 0   | 0   |
| 0   | 0   | 0   | 2   | M   | M   | M   | 1   | 0   | 1   | 0   | 0   |
| 0   | 0   | 1   | 2   | M   | M   | M   | 1   | 1   | 1   | 1   | 0   |
| 0   | 0   | 0   | 2   | M   | M   | M   | 1   | 1   | 1   | 0   | 0   |
| 0   | 0   | 0   | 2   | M   | M   | M   | 1   | 1   | 1   | 1   | 1   |
| 0   | 0   | 1   | 2   | M   | M   | M   | 1   | 0   | 1   | 88  | 0   |
| 0   | 0   | 0   | 2   | M   | M   | M   | 1   | 1   | 1   | 0   | 0   |
| 0   | 0   | 1   | 2   | M   | M   | M   | 1   | 1   | 1   | 0   | 0   |
| 0   | 0   | 1   | 2   | M   | M   | M   | 1   | 1   | 0   | 88  | 1   |
| 0   | 1   | 0   | 1   | 1   | 1   | 1   | 1   | 0   | 1   | 0   | 88  |
| 1   | 0   | 1   | 1   | 8   | 1   | 1   | 1   | 0   | 1   | 0   | 0   |
| 1   | 0   | 0   | 1   | 7   | 1   | 0   | 1   | 1   | 1   | 0   | 0   |
| 0   | 0   | 1   | 2   | M   | M   | M   | 1   | 1   | 1   | 1   | 0   |
| 0   | 0   | 0   | 2   | M   | M   | M   | 1   | 1   | 1   | 0   | 0   |
| 1   | 0   | 0   | 0   | M   | 1   | 1   | 1   | 0   | 1   | 0   | 0   |
| 0   | 0   | 0   | 2   | M   | M   | M   | 1   | 1   | 1   | 0   | 1   |
| 0   | 1   | 0   | 0   | M   | 1   | 1   | 1   | 1   | 1   | 0   | 1   |
| 0   | 0   | 0   | 2   | M   | M   | M   | 1   | 1   | 1   | 0   | 0   |
| 0   | 0   | 0   | 2   | M   | M   | M   | 1   | 1   | 1   | 0   | 0   |
| 0   | 0   | 0   | 2   | M   | M   | M   | 1   | 1   | 1   | 88  | 88  |
| 0   | 0   | 0   | 2   | M   | M   | M   | 1   | 1   | 1   | 1   | 0   |
| 0   | 0   | 0   | 2   | M   | M   | M   | 1   | 0   | 1   | 0   | 1   |
| 0   | 1   | 1   | 0   | M   | M   | M   | 1   | 1   | 1   | 0   | 0   |
| 0   | 0   | 1   | 2   | M   | M   | M   | 1   | 1   | 1   | 1   | 1   |
| 0   | 1   | 1   | 1   | 1   | 0   | 1   | 1   | 1   | 1   | 0   | 0   |
| 0   | 0   | 0   | 2   | M   | M   | M   | 1   | 0   | 1   | 0   | 0   |
| 1   | 0   | 0   | 2   | M   | M   | M   | 1   | 0   | 1   | 88  | 1   |
| 0   | 0   | 0   | 2   | M   | M   | M   | 1   | 0   | 1   | 88  | 0   |
| 0   | 0   | 1   | 2   | M   | M   | M   | 1   | 1   | 1   | 1   | 0   |
| 0   | 0   | 0   | 2   | M   | M   | M   | 1   | 1   | 1   | 0   | 0   |
| 0   | 0   | 0   | 2   | M   | M   | M   | 1   | 1   | 1   | 0   | 0   |
| 0   | 0   | 0   | 2   | M   | M   | M   | 1   | 1   | 1   | 1   | 0   |
| 0   | 0   | 0   | 2   | M   | M   | M   | 1   | 0   | 1   | 0   | 1   |
| 0   | 0   | 0   | 2   | M   | M   | M   | 1   | 0   | 1   | 0   | 0   |
| 1   | 0   | 0   | 2   | M   | M   | M   | 1   | 0   | 1   | 88  | 1   |
| 0   | 0   | 1   | 2   | M   | M   | M   | 1   | 1   | 1   | 1   | 0   |
| 0   | 0   | 0   | 2   | M   | M   | M   | 1   | 1   | 1   | 1   | 0   |
| 0   | 0   | 1   | 2   | M   | M   | M   | 1   | 1   | 1   | 0   | 0   |
| 88  | 88  | 0   | 0   | M   | M   | M   | 1   | 0   | 1   | 0   | 0   |
| 0   | 0   | 0   | 2   | M   | M   | M   | 1   | 0   | 1   | 0   | 0   |

|   |   |   |   |   |   |   |   |   |   |    |    |
|---|---|---|---|---|---|---|---|---|---|----|----|
| 0 | 0 | 1 | 2 | M | M | M | 1 | 1 | 1 | 88 | 0  |
| 0 | 0 | 0 | 2 | M | M | M | 1 | 0 | 1 | 0  | 0  |
| 0 | 0 | 1 | 2 | M | M | M | 1 | 1 | 1 | 0  | 0  |
| 0 | 0 | 0 | 2 | M | M | M | 1 | 1 | 1 | 0  | 0  |
| 1 | 0 | 0 | 1 | 1 | 1 | 1 | 1 | 0 | 1 | 1  | 0  |
| 0 | 0 | 0 | 2 | M | M | M | 1 | 1 | 1 | 0  | 0  |
| 0 | 0 | 0 | 2 | M | M | M | 1 | 0 | 1 | 0  | 1  |
| 0 | 0 | 0 | 2 | M | M | M | 1 | 1 | 1 | 0  | 0  |
| 0 | 0 | 0 | 2 | M | M | M | 1 | 0 | 1 | 1  | 0  |
| 0 | 0 | 0 | 2 | M | M | M | 1 | 0 | 1 | 88 | 88 |
| 0 | 0 | 0 | 2 | M | M | M | 1 | 1 | 1 | 0  | 88 |
| 0 | 0 | 0 | 2 | M | M | M | 1 | 1 | 1 | 0  | 0  |
| 1 | 0 | 0 | 1 | 1 | 1 | 1 | 1 | 0 | 1 | 0  | 0  |
| 0 | 1 | 0 | 0 | M | M | M | 1 | 1 | 1 | 0  | 0  |
| 1 | 0 | 0 | 2 | M | M | M | 1 | 0 | 1 | 1  | 0  |
| 0 | 0 | 1 | 2 | M | M | M | 1 | 1 | 1 | 0  | 1  |
| 0 | 0 | 0 | 2 | M | M | M | 1 | 0 | 0 | 0  | 0  |
| 0 | 0 | 0 | 2 | M | M | M | 1 | 0 | 1 | 0  | 1  |
| 0 | 0 | 1 | 2 | M | M | M | 1 | 1 | 1 | 1  | 0  |
| 0 | 0 | 1 | 2 | M | M | M | 1 | 1 | 1 | 0  | 1  |
| 0 | 0 | 1 | 2 | M | M | M | 1 | 1 | 1 | 0  | 0  |
| 0 | 0 | 1 | 1 | 8 | 1 | 1 | 1 | 1 | 1 | 0  | 0  |
| 0 | 0 | 0 | 2 | M | M | M | 1 | 0 | 1 | 0  | 0  |
| 0 | 0 | 1 | 2 | M | M | M | 1 | 1 | 1 | 1  | 0  |
| 0 | 0 | 1 | 2 | M | M | M | 1 | 0 | 1 | 1  | 0  |
| 0 | 0 | 0 | 2 | M | M | M | 1 | 1 | 1 | 0  | 0  |
| 0 | 0 | 1 | 2 | M | M | M | 1 | 0 | 1 | 0  | 88 |
| 0 | 0 | 0 | 2 | M | M | M | 1 | 1 | 1 | 1  | 0  |
| 0 | 0 | 0 | 2 | M | M | M | 1 | 1 | 1 | 0  | 0  |
| 0 | 0 | 1 | 2 | M | M | M | 1 | 0 | 1 | 0  | 0  |
| 0 | 0 | 0 | 2 | M | M | M | 1 | 0 | 1 | 0  | 0  |
| 0 | 0 | 1 | 2 | M | M | M | 1 | 1 | 1 | 88 | 0  |
| 0 | 0 | 0 | 2 | M | M | M | 1 | 0 | 1 | 0  | 0  |
| 0 | 0 | 0 | 2 | M | M | M | 1 | 0 | 1 | 1  | 0  |
| 0 | 0 | 0 | 2 | M | M | M | 1 | 0 | 1 | 88 | 88 |
| 0 | 0 | 0 | 2 | M | M | M | 1 | 1 | 1 | 0  | 88 |
| 0 | 0 | 0 | 2 | M | M | M | 1 | 1 | 1 | 0  | 0  |
| 0 | 0 | 0 | 2 | M | M | M | 1 | 0 | 0 | 0  | 0  |
| 0 | 0 | 0 | 2 | M | M | M | 1 | 0 | 1 | 0  | 1  |
| 0 | 0 | 1 | 2 | M | M | M | 1 | 1 | 1 | 1  | 0  |
| 0 | 0 | 1 | 2 | M | M | M | 1 | 1 | 1 | 0  | 1  |
| 0 | 0 | 1 | 2 | M | M | M | 1 | 1 | 1 | 0  | 0  |
| 0 | 0 | 1 | 1 | 8 | 1 | 1 | 1 | 1 | 1 | 0  | 0  |
| 0 | 0 | 0 | 2 | M | M | M | 1 | 0 | 1 | 0  | 0  |
